# Supplementary material
Source: PubMed Central journal article supplement (PMC3318401)

IPI 00473066 (100%) 190kd<sup>+</sup>

IPI:IPI 00473066 Tax\_Id=9636 Geng\_Symbol=MRC1L1: Isoform 1 of Macrophage mannose, 9 unique peptides, 9 unique spectra, 10 total spectra 100/249 amino acids (40% coverage)<sup>+</sup>

|                   |                    |                    |                                |
|-------------------|--------------------|--------------------|--------------------------------|
| VSESQIMSVV        | NRQEKNIIMLY        | RGYEA MYTLL        | DCTSAGRSDG <sup>+</sup>        |
| FKLCLGVPSK        | KGSGLWSRWK         | GNANGATCAV         | <b>TNG AFTGEIS<sup>+</sup></b> |
| <b>PGMIKTDWVA</b> | IYGT TDNLCR        | <b>HVFGESD ELI</b> | <b>GQKWLWC GTT<sup>+</sup></b> |
| ITLYACDSKS        | K <b>LDEREAGIT</b> | <b>EKVVFQTKV</b>   | <b>IADNVKDW SK<sup>+</sup></b> |
| <b>VVLAYEPVWA</b> | <b>IGTGK TATPQ</b> | <b>QAQEVHEKLR</b>  | GWLKSNVSDA <sup>+</sup>        |
| EFQKWEI IYG       | <b>GSVTGATCKE</b>  | PFKFENKWYA         | LVGGASLKPE <sup>+</sup>        |

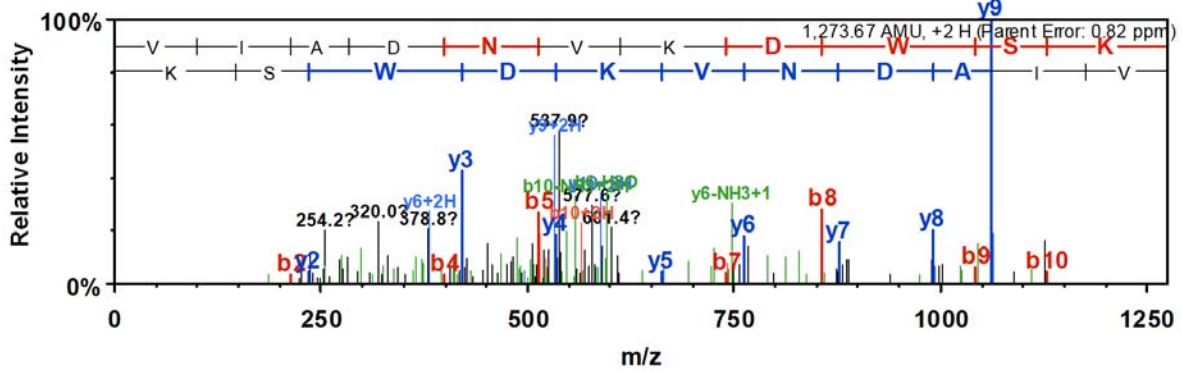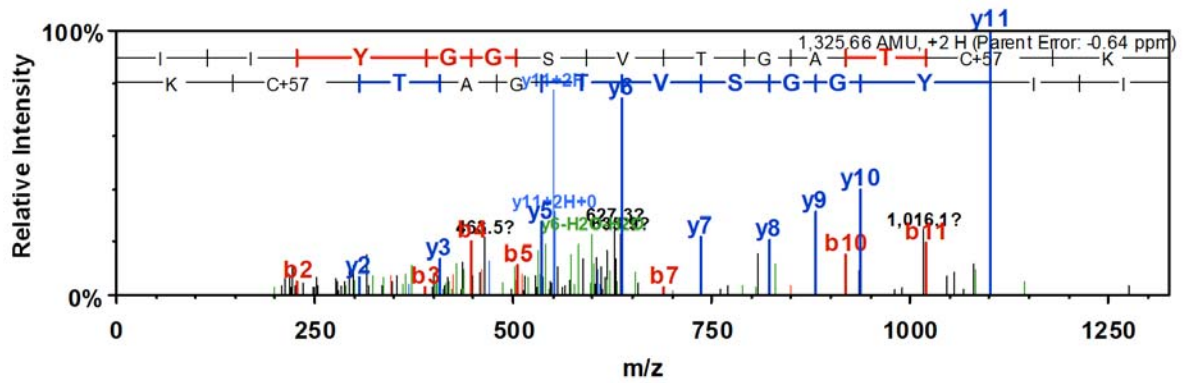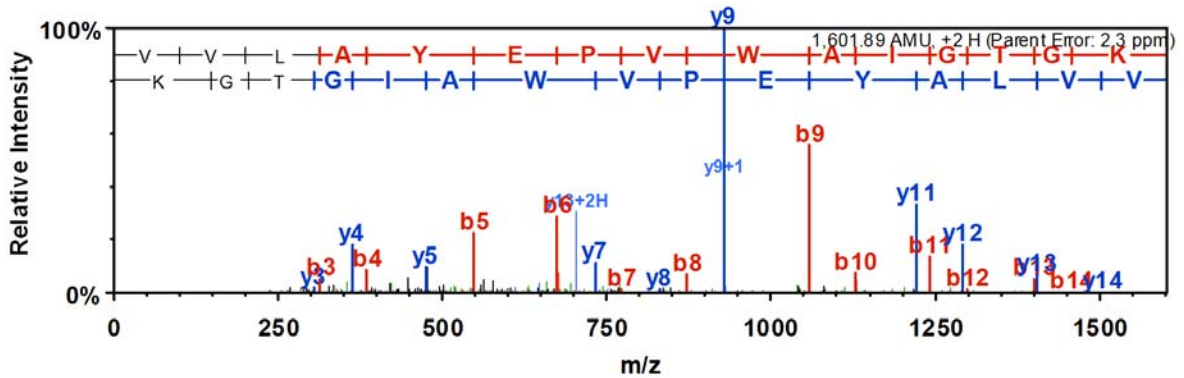

Supplement: supp_80.4.1343_IAI-IAI05930-11-s01.pdf [file supp_80.4.1343_IAI-IAI05930-11-s01.pdf]
